# Supplementary material for: Association Between Life's Simple 7 and Noncardiovascular Disease: The Multi‐Ethnic Study of Atherosclerosis
Source: PubMed Central journal article supplement — J Am Heart Assoc. 2016 Oct 20;5(10):e003954. doi: 10.1161/JAHA.116.003954 (PMC5121499; doi:10.1161/jaha.116.003954), 2016-10-20
Supplement: JAH3-5-e003954-s001.pdf [file JAH3-5-e003954-s001.pdf]

**SUPPLEMENTAL MATERIAL**

**Table S1.** Components of the LS7 Score

| <b>LS7 Metrics</b>        | <b>Score</b> | <b>Definition</b>                                                    | <b>% MESA Participants</b> |
|---------------------------|--------------|----------------------------------------------------------------------|----------------------------|
| <b>Smoking</b>            | 0            | Current smoker                                                       | 12.9                       |
|                           | 1            | Former smoker, quit $\leq$ 12 mo ago                                 | 1.2                        |
|                           | 2            | Never smoker or quit $>$ 12 mo ago                                   | 85.9                       |
| <b>BMI</b>                | 0            | $\geq$ 30 kg/m <sup>2</sup>                                          | 31.9                       |
|                           | 1            | 25.0–29.99 kg/m <sup>2</sup>                                         | 39.3                       |
|                           | 2            | $<$ 25.0 kg/m <sup>2</sup>                                           | 28.8                       |
| <b>Physical activity*</b> | 0            | No exercise                                                          | 22.8                       |
|                           | 1            | 1–149 min of moderate exercise or 1–74 min of vigorous exercise/week | 17.3                       |
|                           | 2            | 150+ min of moderate exercise or 75+ min of vigorous exercise/week   | 59.8                       |
| <b>Diet</b>               | 0            | 0–1 components of healthy diet                                       | 45.2                       |
|                           | 1            | 2–3 components of healthy diet                                       | 53.7                       |
|                           | 2            | 4–5 components of healthy diet                                       | 1.1                        |
| <b>Blood pressure</b>     | 0            | SBP $\geq$ 140 mmHg or DBP $\geq$ 90 mmHg                            | 37.5                       |
|                           | 1            | SBP 120–139 mmHg or DBP 80–89 mmHg or treated to $<$ 120/80 mmHg     | 28.0                       |
|                           | 2            | $<$ 120/80 mm Hg, unmedicated                                        | 34.6                       |
| <b>Total cholesterol</b>  | 0            | $\geq$ 240 mg/dL                                                     | 13.4                       |
|                           | 1            | 200–239 mg/dL or treated to $<$ 200 mg/dL                            | 39.1                       |
|                           | 2            | $<$ 200 mg/dL, unmedicated                                           | 47.5                       |
| <b>Blood glucose</b>      | 0            | $\geq$ 126 mg/dL fasting                                             | 10.8                       |
|                           | 1            | 100–125 mg/dL fasting or treated to $<$ 100 mg/dL                    | 15.2                       |
|                           | 2            | $<$ 100 mg/dL fasting, unmedicated                                   | 74.1                       |

Adapted from Lloyd Jones et al <sup>1</sup> and Unger et al <sup>2</sup>, BMI indicates body mass index; DBP, diastolic blood pressure; SBP, systolic blood pressure; MESA, Multi-Ethnic Study of Atherosclerosis. Poor=0 point, Intermediate=1 point, ideal =2 points \*When combining vigorous and moderate exercise, vigorous exercise was weighted double.

**Table S2.** ICD-9 codes of non-CVD diagnosis of interest

| <b>Non-Cardiovascular Disease<br/>Diagnosis of Interest</b>                              | <b>ICD9 Code</b> | <b>ICD9 Diagnosis Description</b>                                                  |
|------------------------------------------------------------------------------------------|------------------|------------------------------------------------------------------------------------|
| Chronic kidney disease and indicators of end stage renal failure                         | 585.             | CHRONIC KIDNEY DISEASE (CKD)                                                       |
| Cancer (malignant neoplasms only)                                                        | 140. to 208.92   | MALIGNANT NEOPLASMS                                                                |
| Dementia (Senile dementia, including vascular dementia, Alzheimer's, and Pick's disease) | 290.             | DEMENTIAS                                                                          |
| Pneumonia                                                                                | 480. to 487.8    | VIRAL PNEUMONIA, BACTERIAL PNEUMONIA etc                                           |
| Chronic obstructive pulmonary disease (COPD)                                             | 490.             | CHRONIC BRONCHITIS, EMPHYSEMA etc                                                  |
| Hip fracture                                                                             | 820.             | FRACTURE OF NECK OF FEMUR, FRACTURE OF BASE OF NECK OF FEMUR, CLOSED etc           |
| Deep vein thrombosis or Pulmonary embolism                                               | 415.1            | PULMONARY EMBOLISM AND INFARCTION, EMBOLISM AND THROMBOSIS OF UNSPECIFIED SITE etc |

A more detailed version can be found online at: <https://www.cms.gov/medicare-coverage-database/staticpages/icd-9-code-lookup.aspx>

**Figure S1.** Event rate per 1000 person-years of participants <65 years with Non-CVD by LS7 Score

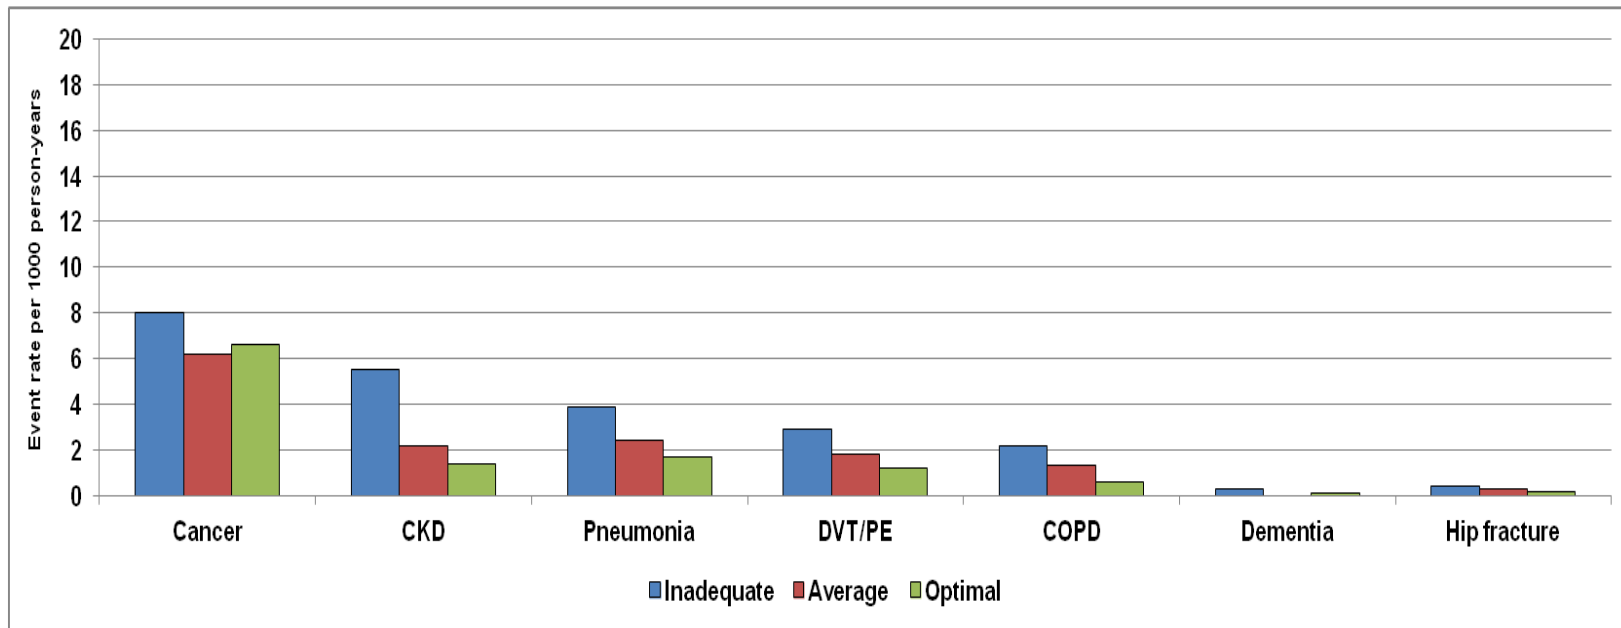

Event rate per 1000 person-years of participants <65 years with Non-CVD by LS7 Score

The Life's Simple 7 (LS7) score ranged from 0-14 and was classified into inadequate (0-8), average (9-10) and optimal (11-14) based on points assigned to each category of the LS7 metrics

Abbreviations: CKD, Chronic Kidney Disease, DVT/PE, Deep Venous Thromboembolism/Pulmonary Embolism; COPD, Chronic Obstructive Pulmonary Disease

**Figure S2.** Event rate per 1000 person-years of participants'  $\geq 65$  years with Non-CVD by LS7 Score

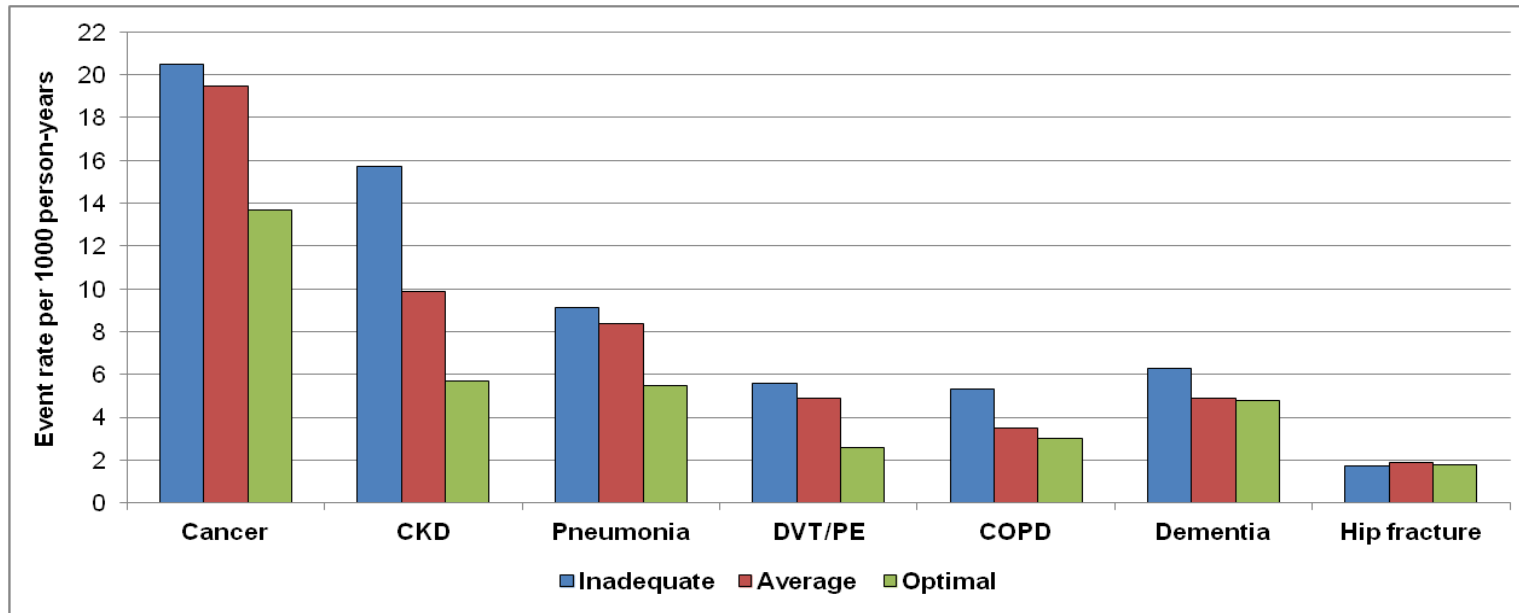

Event rate per 1000 person-years of participants'  $\geq 65$  years with Non-CVD by LS7 Score

The Life's Simple 7 (LS7) score ranged from 0-14 and was classified into inadequate (0-8), average (9-10) and optimal (11-14) based on points assigned to each category of the LS7 metrics

Abbreviations: CKD, Chronic Kidney Disease, DVT/PE, Deep Venous Thromboembolism/Pulmonary Embolism; COPD, Chronic Obstructive Pulmonary Disease

**Figure S3.**Event rate per 1000 person-years of women with Non-CVD by LS7 Score

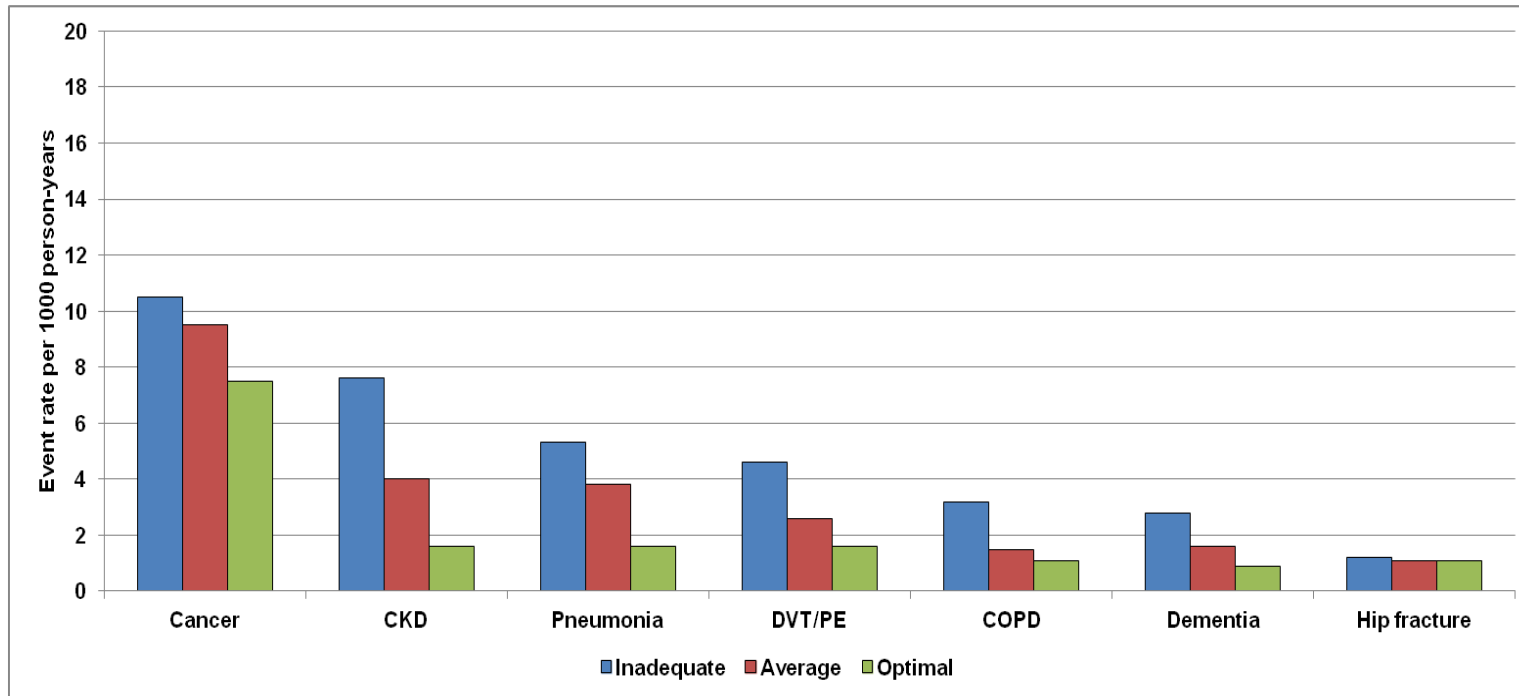

Event rate per 1000 person-years of women with Non-CVD by LS7 Score

The Life's Simple 7 (LS7) score ranged from 0-14 and was classified into inadequate (0-8), average (9-10) and optimal (11-14) based on points assigned to each category of the LS7 metrics

Abbreviations: CKD, Chronic Kidney Disease, DVT/PE, Deep Venous Thromboembolism/Pulmonary Embolism; COPD, Chronic Obstructive Pulmonary Disease

**Figure S4.** Event rate per 1000 person-years of men with Non-CVD by LS7 Score

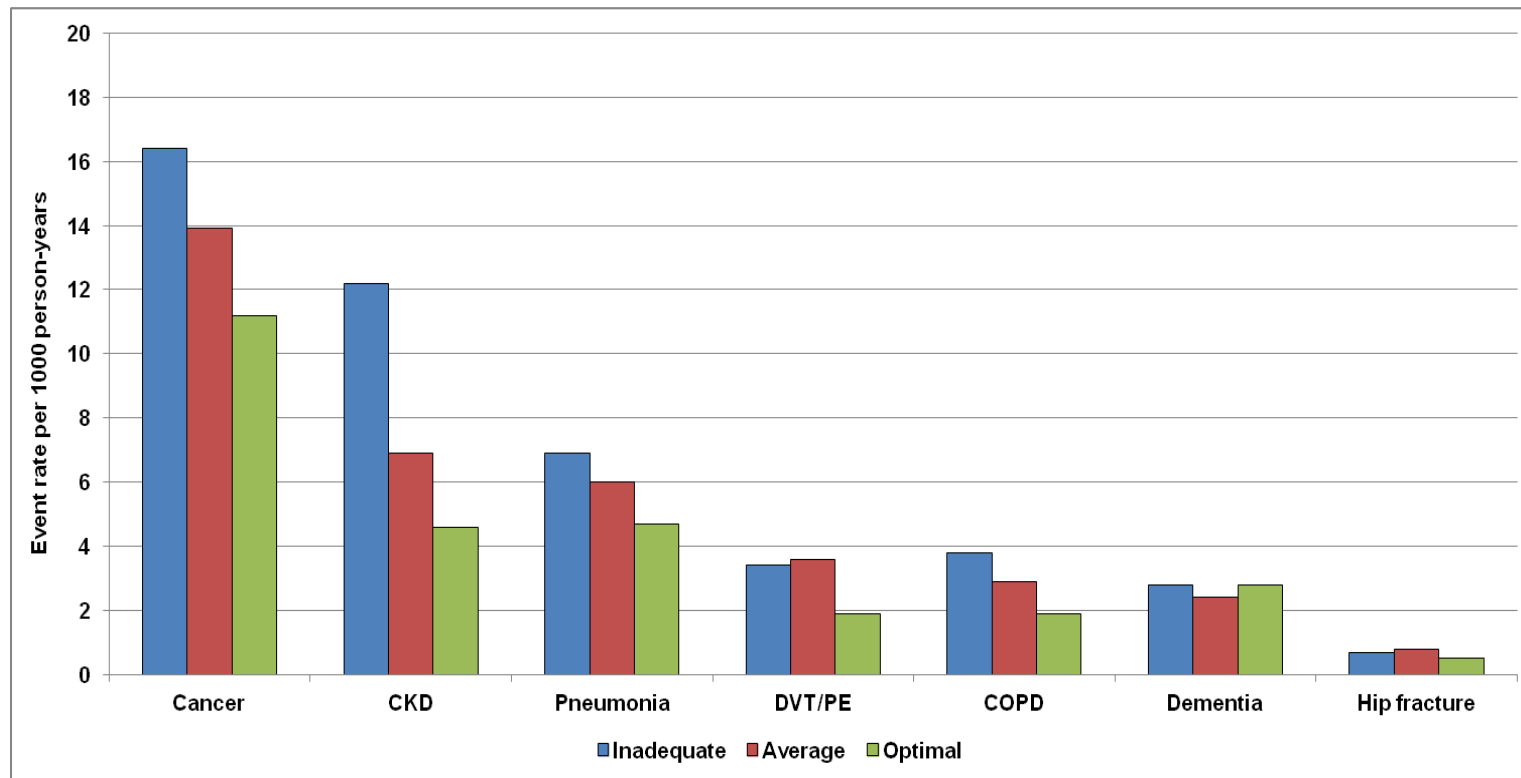

Event rate per 1000 person-years of men with Non-CVD by LS7 Score

The Life's Simple 7 (LS7) score ranged from 0-14 and was classified into inadequate (0-8), average (9-10) and optimal (11-14) based on points assigned to each category of the LS7 metrics

Abbreviations: CKD, Chronic Kidney Disease, DVT/PE, Deep Venous Thromboembolism/Pulmonary Embolism; COPD, Chronic Obstructive Pulmonary Disease

**Figure S5.** Event rate per 1000 person-years of White participants with Non-CVD by LS7 Score

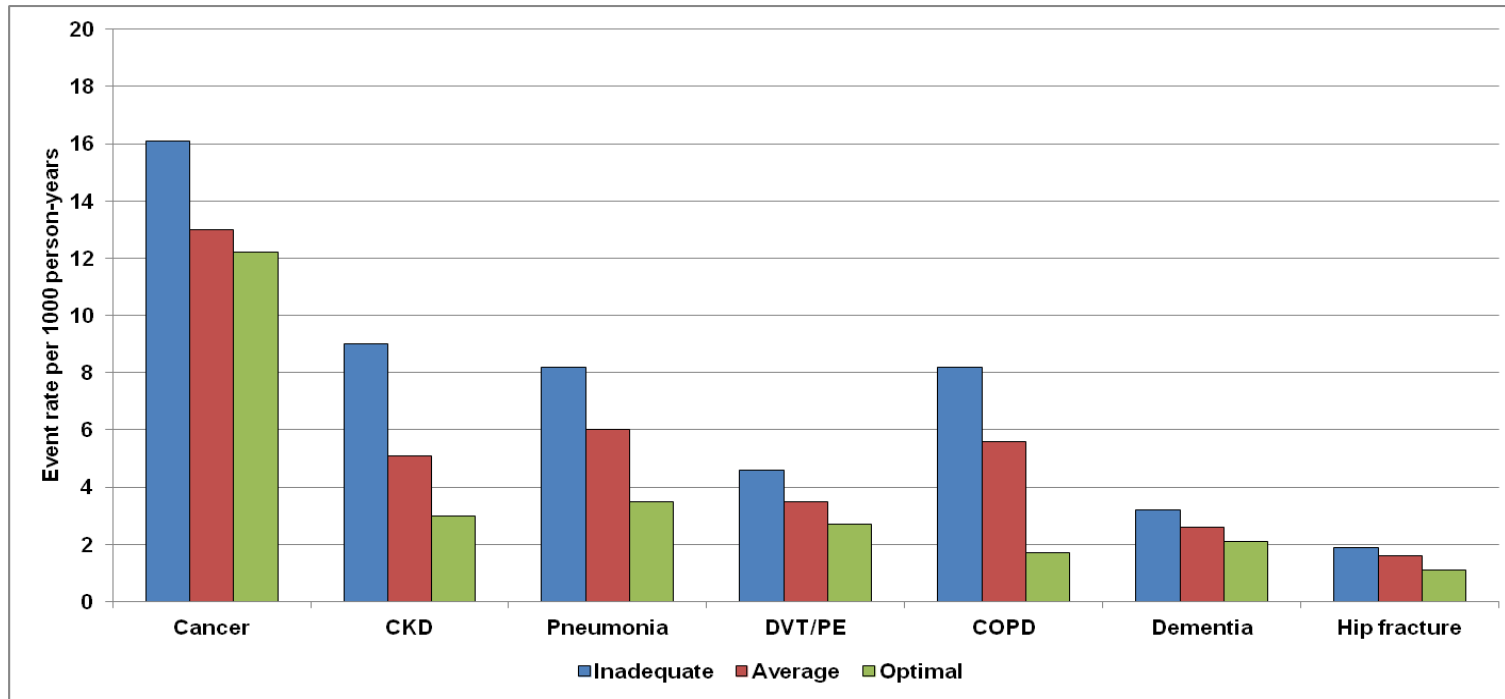

Event rate per 1000 person-years of White participants with Non-CVD by LS7 Score

The Life's Simple 7 (LS7) score ranged from 0-14 and was classified into inadequate (0-8), average (9-10) and optimal (11-14) based on points assigned to each category of the LS7 metrics.

Abbreviations: CKD, Chronic Kidney Disease, DVT/PE, Deep Venous Thromboembolism/Pulmonary Embolism; COPD, Chronic Obstructive Pulmonary Disease



**Figure S6.** Event rate per 1000 person-years of African-American participants with Non-CVD by LS7 Score

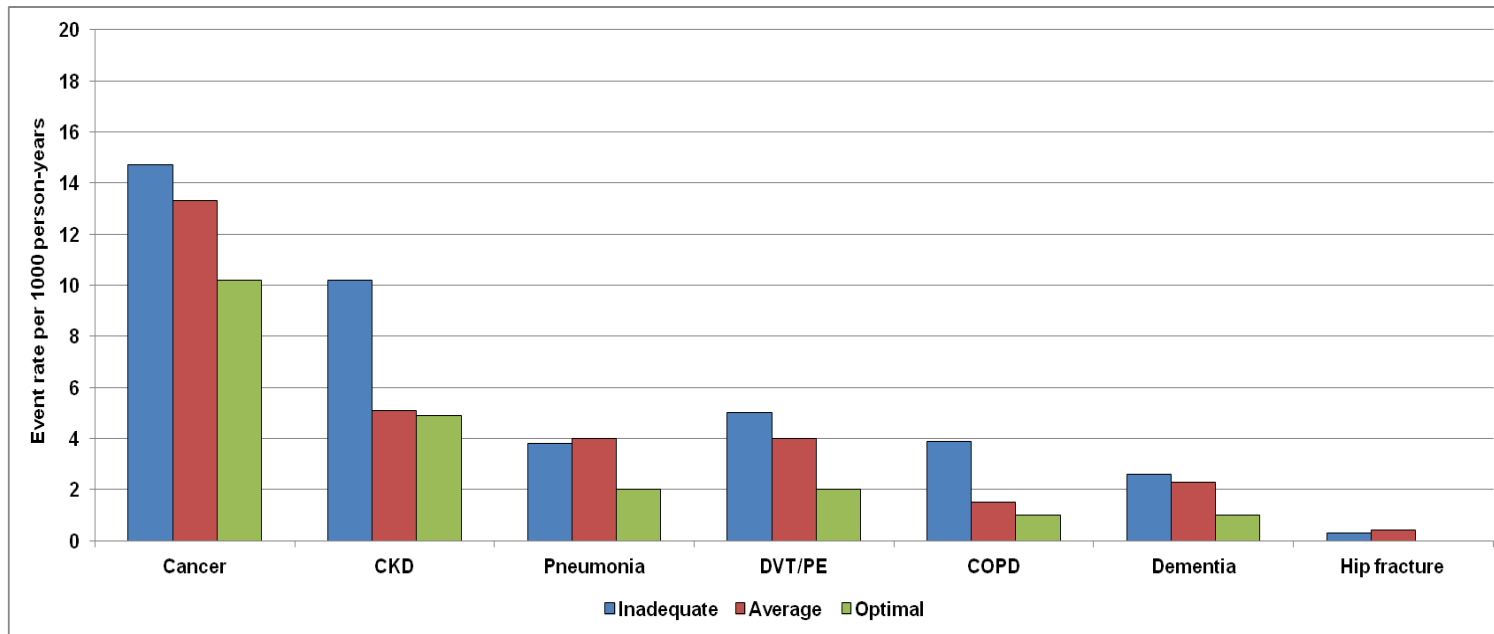

Event rate per 1000 person-years of African-American participants with Non-CVD by LS7 Score

The Life's Simple 7 (LS7) score ranged from 0-14 and was classified into inadequate (0-8), average (9-10) and optimal (11-14) based on points assigned to each category of the LS7 metrics

Abbreviations: CKD, Chronic Kidney Disease, DVT/PE, Deep Venous Thromboembolism/Pulmonary Embolism; COPD, Chronic Obstructive Pulmonary Disease

**Figure S7.** Event rate per 1000 person-years of Hispanic participants with Non-CVD by LS7 Score

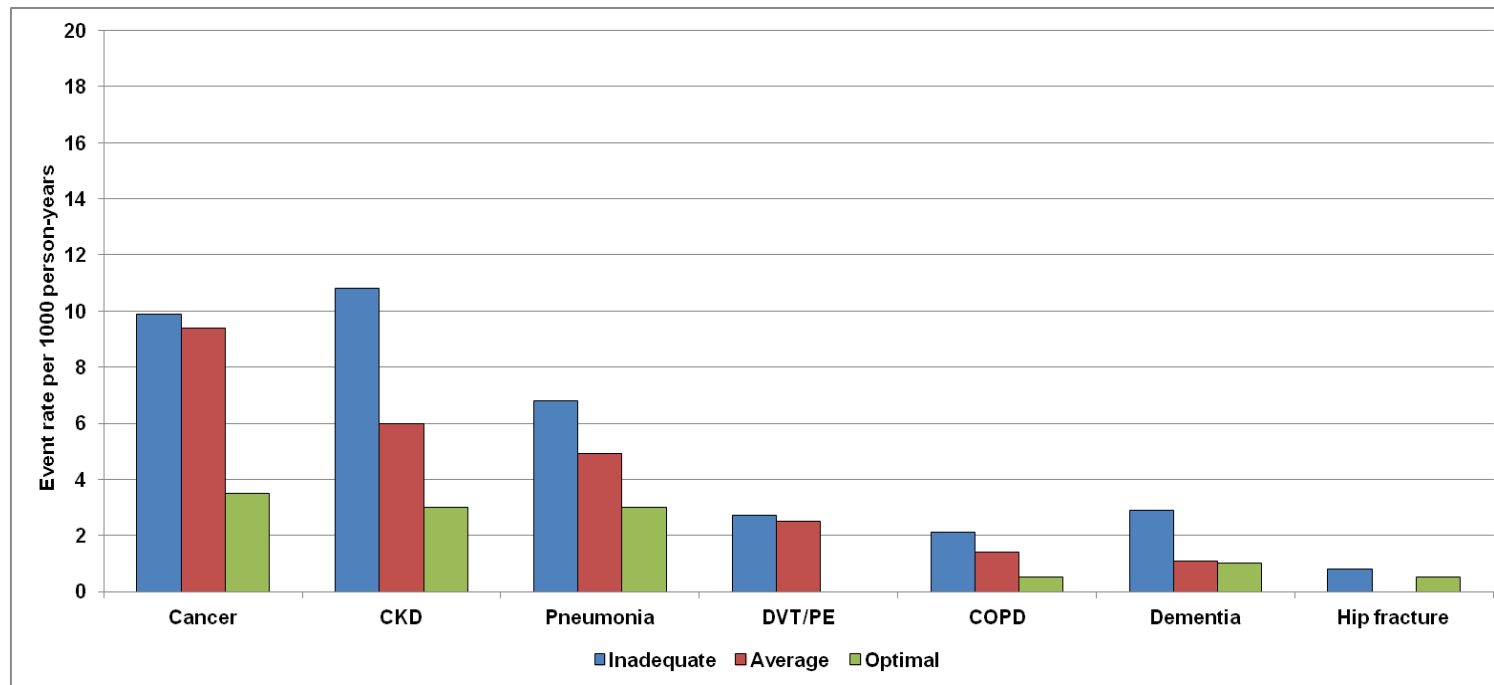

Event rate per 1000 person-years of Hispanic participants with Non-CVD by LS7 Score

The Life's Simple 7 (LS7) score ranged from 0-14 and was classified into inadequate (0-8), average (9-10) and optimal (11-14) based on points assigned to each category of the LS7 metrics

Abbreviations: CKD, Chronic Kidney Disease, DVT/PE, Deep Venous Thromboembolism/Pulmonary Embolism; COPD, Chronic Obstructive Pulmonary Disease

**Figure S8.** Event rate per 1000 person-years of Chinese-American participants with Non-CVD by LS7 Score

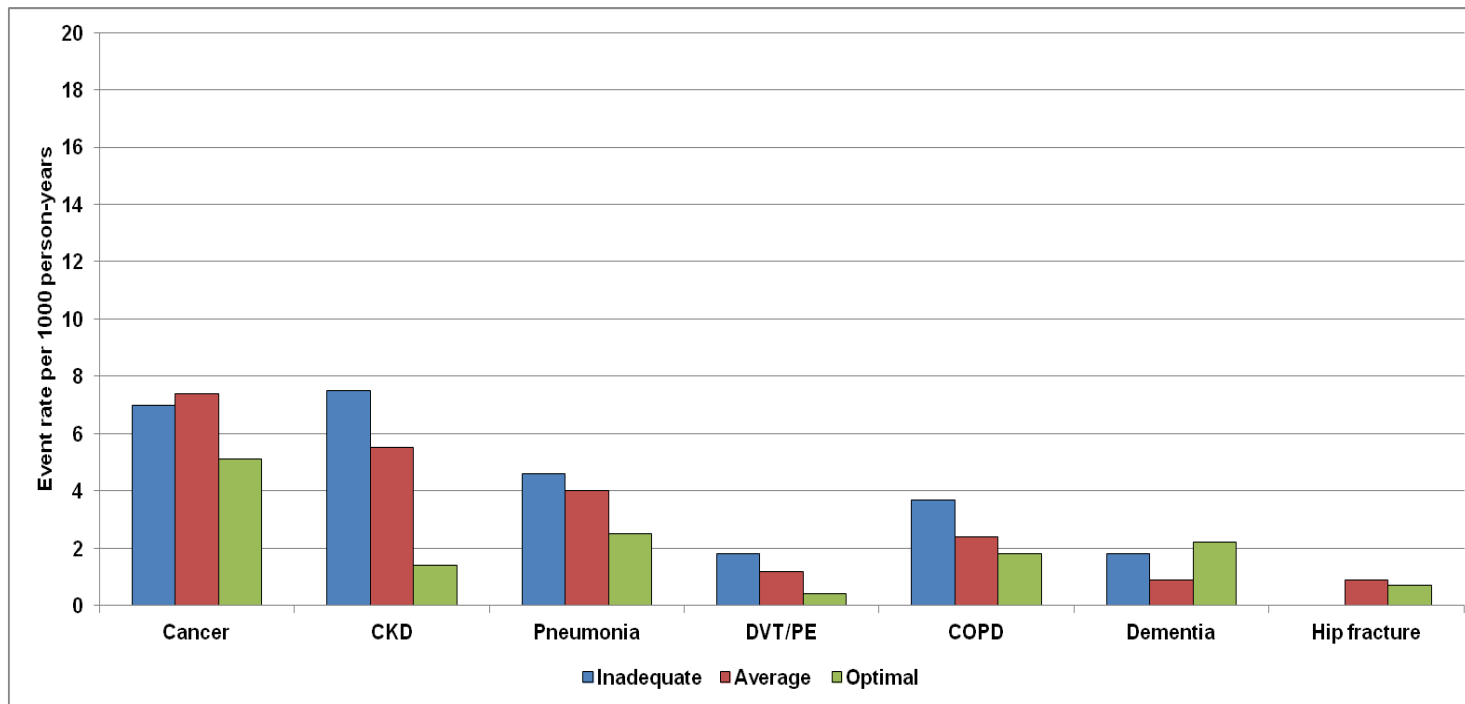

Event rate per 1000 person-years of Chinese-American participants with Non-CVD by LS7 Score

The Life's Simple 7 (LS7) score ranged from 0-14 and was classified into inadequate (0-8), average (9-10) and optimal (11-14) based on points assigned to each category of the LS7 metrics

Abbreviations: CKD, Chronic Kidney Disease, DVT/PE, Deep Venous Thromboembolism/Pulmonary Embolism; COPD, Chronic Obstructive Pulmonary Disease

**Figure S9.** Kaplan Meier curves for non-CVD events and the aggregate outcome of any non-CVD diagnosis

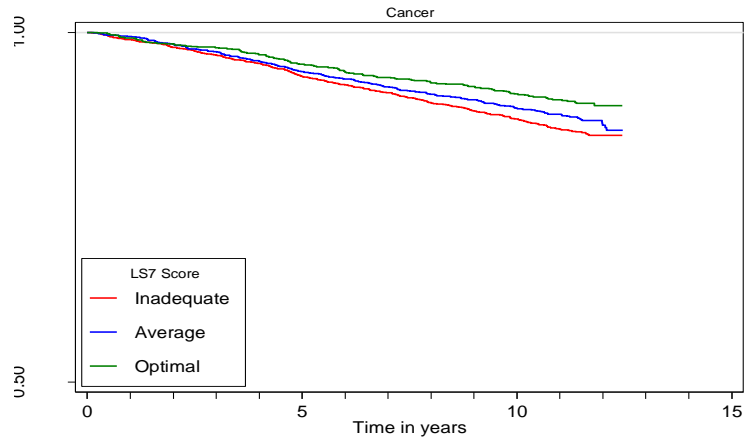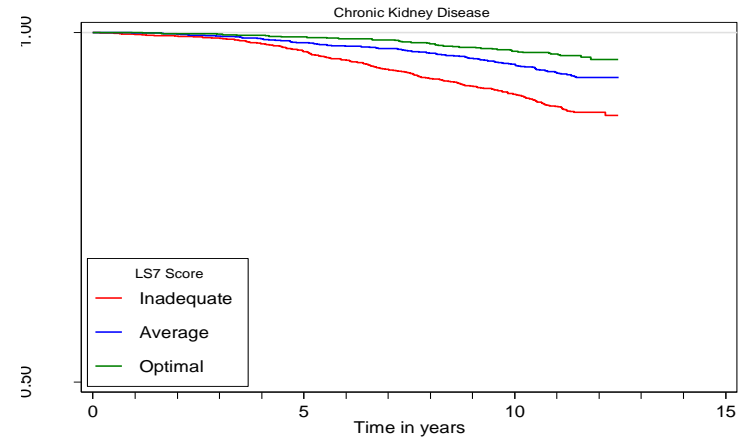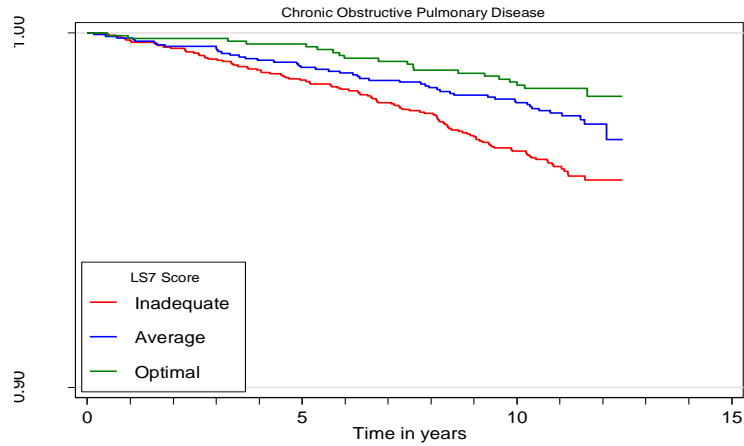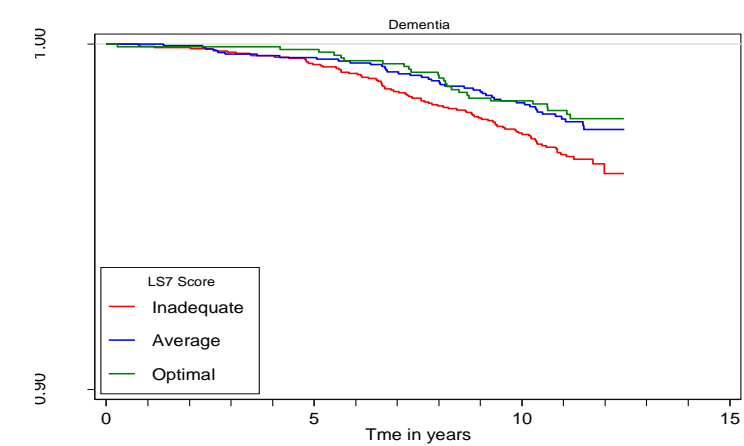

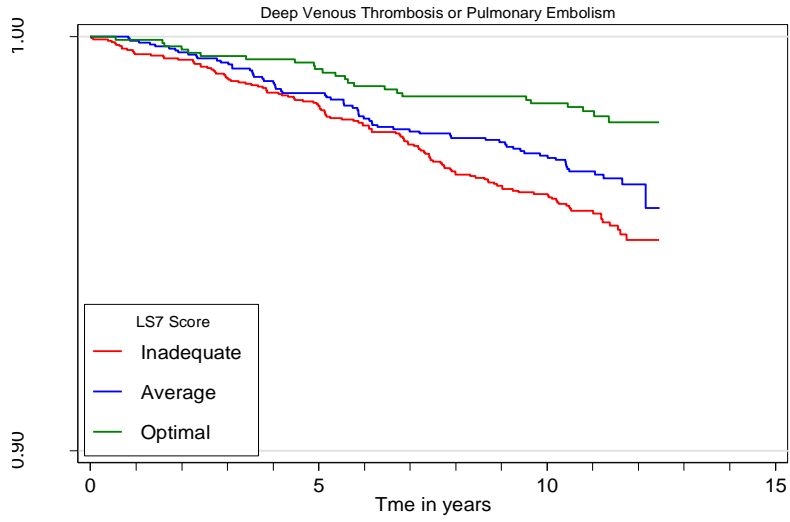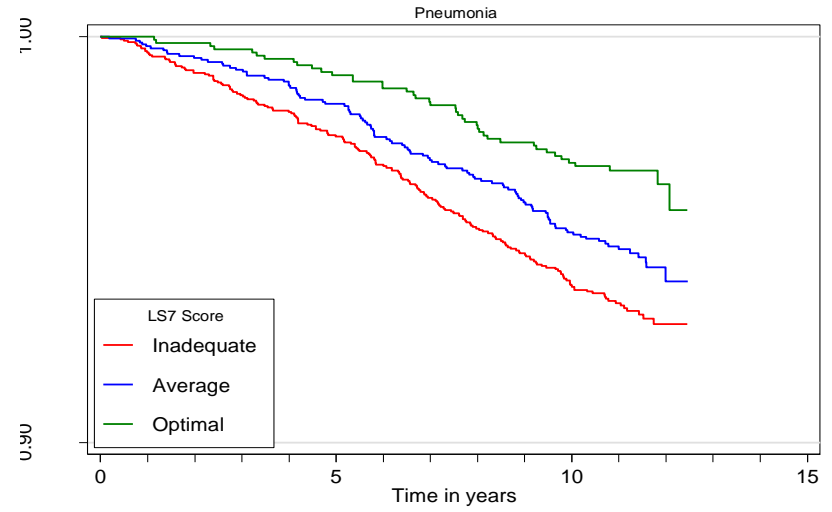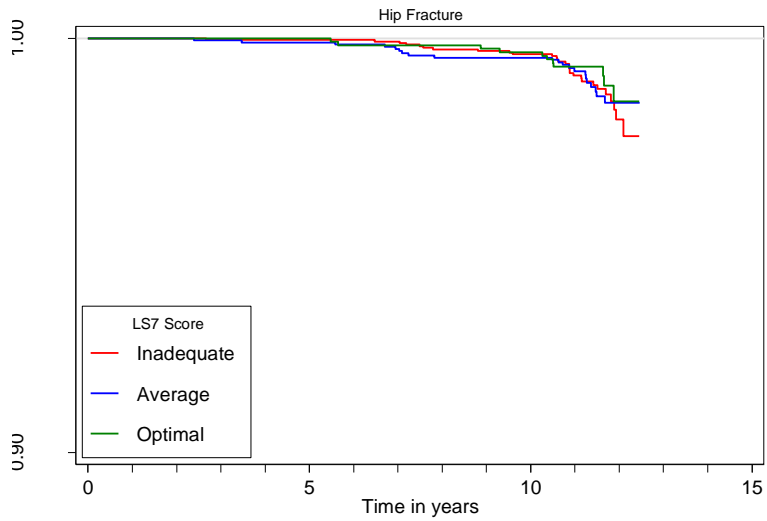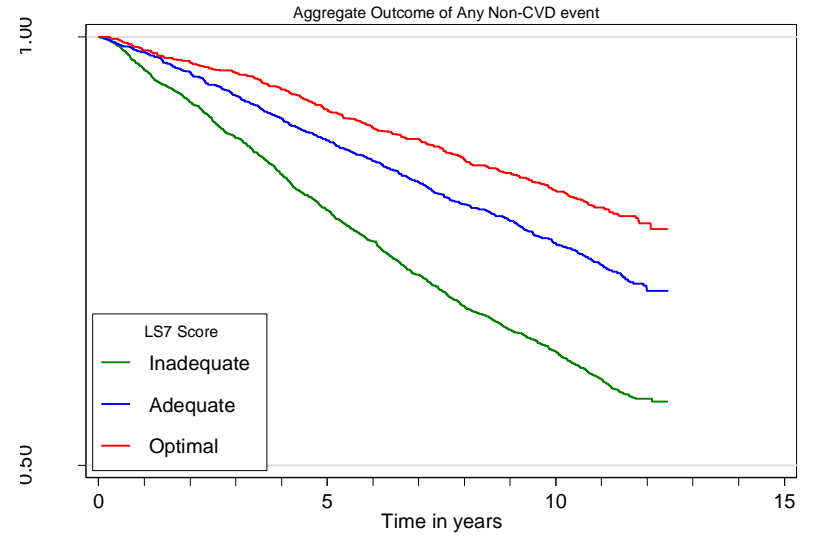

**Figure S10.** Event rate per 1000 person-years of study participants with any Non-CVD event by LS7 Score

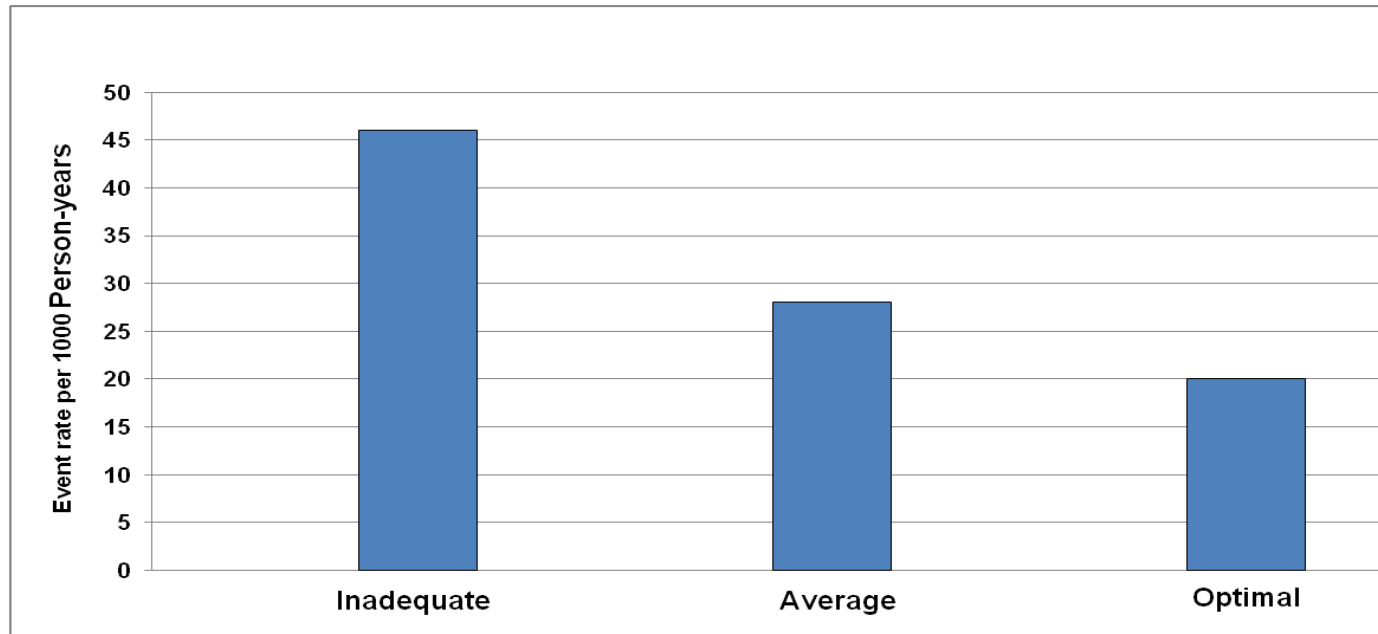

|                                                                                | Inadequate | Average          | Optimal          |
|--------------------------------------------------------------------------------|------------|------------------|------------------|
| Unadjusted HR                                                                  | 1.0        | 0.61 (0.55-0.67) | 0.43 (0.38-0.50) |
| Adjusted HR                                                                    | 1.0        | 0.66 (0.60-0.73) | 0.53 (0.46-0.61) |
| Hazard ratios were adjusted for age, sex, race/ethnicity, income and education |            |                  |                  |

**Figure S11.** Event rate per 1000 person-years of participants with income <\$40,000 with Non-CVD by LS7 Score

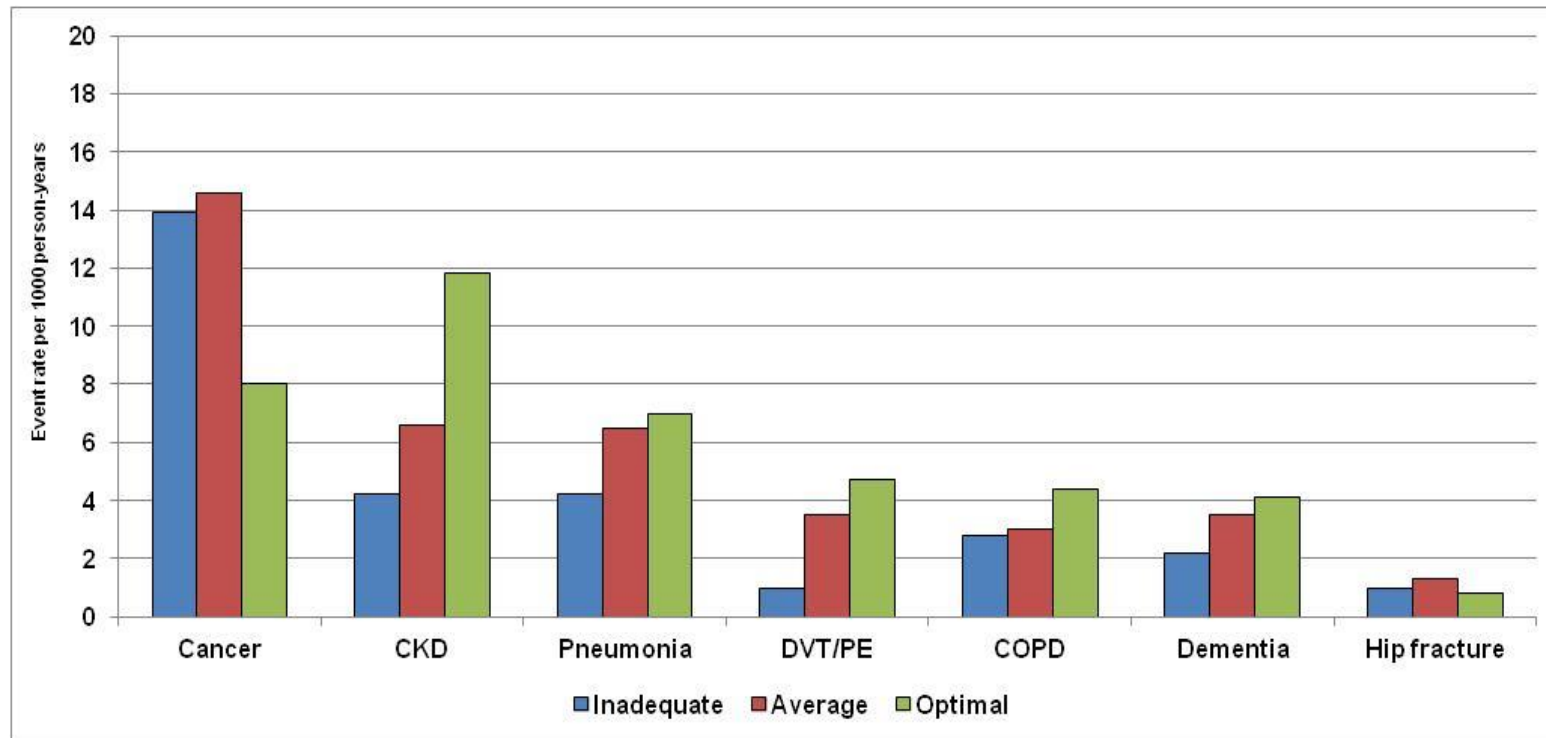

Event rate per 1000 person-years of participants with income <\$40,000 with Non-CVD by LS7 Score

The Life's Simple 7 (LS7) score ranged from 0-14 and was classified into inadequate (0-8), average (9-10) and optimal (11-14) based on points assigned to each category of the LS7 metrics

Abbreviations: CKD, Chronic Kidney Disease, DVT/PE, Deep Venous Thromboembolism/Pulmonary Embolism; COPD, Chronic Obstructive Pulmonary Disease

**Figure S12.** Event rate per 1000 person-years of participants with income  $\geq$ \$40,000 with Non-CVD by LS7 Score

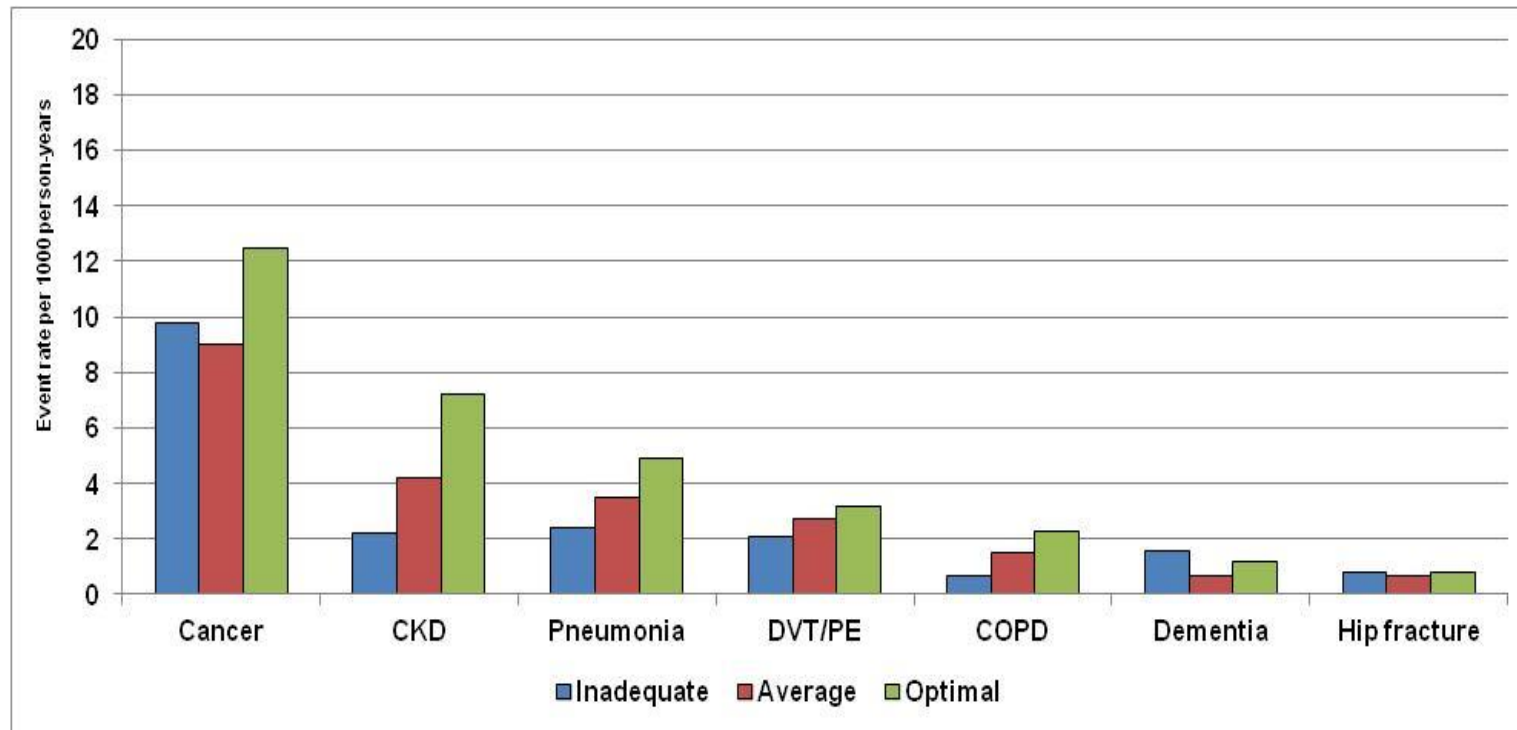

Event rate per 1000 person-years of participants with income  $\geq$ \$40,000 with Non-CVD by LS7 Score

The Life's Simple 7 (LS7) score ranged from 0-14 and was classified into inadequate (0-8), average (9-10) and optimal (11-14) based on points assigned to each category of the LS7 metrics

Abbreviations: CKD, Chronic Kidney Disease, DVT/PE, Deep Venous Thromboembolism/Pulmonary Embolism; COPD, Chronic Obstructive Pulmonary Disease



**References:**

1. Lloyd-Jones DM, Hong Y, Labarthe D, Mozaffarian D, Appel LJ, Van Horn L, Greenlund K, Daniels S, Nichol G, Tomaselli GF, Arnett DK, Fonarow GC, Ho PM, Lauer MS, Masoudi FA, Robertson RM, Roger V, Schwamm LH, Sorlie P, Yancy CW, Rosamond WD; American Heart Association Strategic Planning Task Force and Statistics Committee. Defining and setting national goals for cardiovascular health promotion and disease reduction: the American Heart Association's strategic Impact Goal through 2020 and beyond. *Circulation*. 2010;121:586-613.
2. Unger E, Diez-Roux AV, Lloyd-Jones DM, Mujahid MS, Nettleton JA, Bertoni A, Badon SE, Ning H, Allen NB. Association of neighborhood characteristics with cardiovascular health in the Multi-Ethnic Study of Atherosclerosis. *Circ Cardiovasc Qual Outcomes*. 2014;7:524-531.
